# Supplementary material for: Size-Exclusion Chromatography Combined with Ultrafiltration Efficiently Isolates Extracellular Vesicles from Human Blood Samples in Health and Disease
Source: MDPI journal article supplement (doi:10.3390/ijms24043663), 2023-02-11
Supplement: s1 [file s1]

## SUPPLEMENTARY

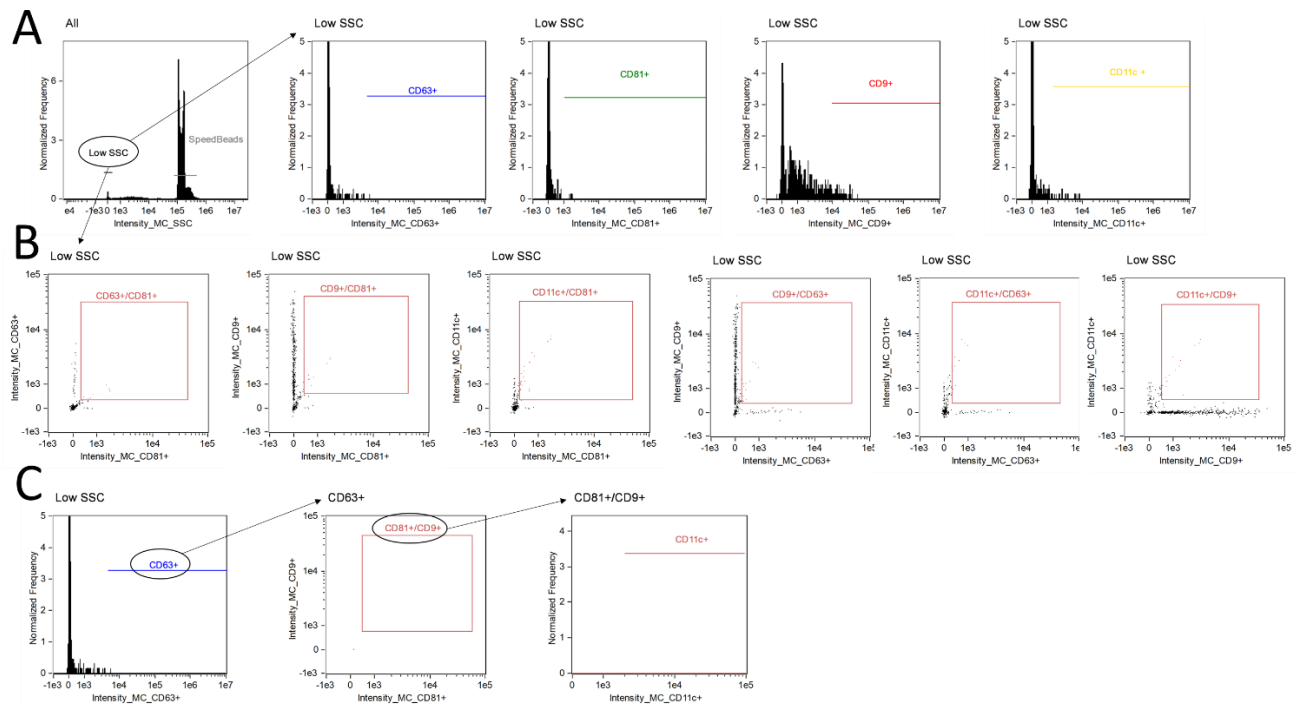

**Figure S1. EVs gating strategy applied through imaging flow cytometry.** Representative figure of IFC EVs gating strategy by applying the “Intensity\_MC” of SSC versus the “Normalized Frequency” in a histogram to identify the Low SSC area limited to the area under the Speed Beads. The graphs show single-positive EVs (A), double-positive EVs (B), and multiple-positive EVs (C) descending from the Low SSC area reporting the fluorescent-positive particles.

**Table S1. Protein concentrations in PFP samples and EVs fractions**

| Protein concentration [mg/mL] |        |               |       |
|-------------------------------|--------|---------------|-------|
| PFP samples                   |        | EVs fractions |       |
| IIM                           | HDs    | IIM           | HDs   |
| 50.236                        | 52.586 | 0.068         | 0.032 |
| 52.932                        | 52.642 | 0.016         | 0     |
| 57.089                        | 49.82  | 0.025         | 0     |
| 56.688                        | 50.227 | 0.046         | 0.044 |
| 52.297                        | 52.254 | 0.103         | 0.156 |
| 57.93                         | 50.909 | 0.031         | 0.046 |
| 51.544                        | 45.662 | 0.045         | 0.044 |
| 45.156                        | 52.736 | 0.105         | 0.009 |
| 47.192                        | 46.975 | 0.045         | 0.047 |
| 48                            | 50.096 | 0.092         | 0.091 |
| 52.029                        | 48.151 | 0.148         | 0.059 |
| 55.647                        | 53.003 | 0.193         | 0.113 |
| 49.33                         | 64.039 | 0.048         | 0.013 |
| 51.055                        | 52.382 | 0.091         | 0.01  |
| 51.648                        | 46.474 | 0.068         | 0.057 |
| 50.299                        | 48.064 | 0.065         | 0.072 |
| 52.214                        | 50.454 | 0.07          | 0.056 |
| 50.081                        | 56.74  | 0.123         | 0.085 |

|        |        |       |       |
|--------|--------|-------|-------|
| 50.947 | 48.33  | 0.088 | 0.03  |
| 52.025 | 51.782 | 0.073 | 0.048 |
| 60.307 | 48.627 | 0.143 | 0.171 |
| 55.883 | 50.057 | 0.081 | 0.139 |
| 55.576 | 56.817 | 0.164 | 0.121 |
| 49.932 | 53.937 | 0.087 | 0.025 |
| 56.349 | 57.047 | 0.32  | 0.27  |
| 62.482 | 53.018 | 0.112 | 0.048 |
| 47.227 | 54.785 | 0.038 | 0.154 |
| 49.843 | 46.077 | 0.056 | 0.063 |
| 49.007 | 53.371 | 0.015 | 0.043 |
| 57.039 | 59.523 | 0.029 | 0.189 |
| 52.676 | 52.057 | 0.041 | 0.063 |
| 52.089 | 50.68  | 0.023 | 0.047 |
| 50.371 | 53.528 | 0.135 | 0.256 |
| 54.426 | 53.64  | 0.047 | 0.043 |
| 53.757 | 53.9   | 0.026 | 0.099 |
| 53.464 | 58.249 | 0.032 | 0.024 |
| 48.304 | 53.586 | 0.031 | 0.052 |
| 60.56  | 53.669 | 0.02  | 0.092 |
| 54.08  | 60.247 | 0.041 | 0.127 |
| 54.73  | 51.415 | 0.067 | 0.022 |
| 48.535 | 54.219 | 0.046 | 0.057 |
| 48.409 | 45.342 | 0.041 | 0.029 |
| 48.745 | 55.096 | 0.135 | 0.069 |
| 62.537 | 56.812 | 0.075 | 0.021 |
| 54.547 | 55.855 | 0.027 | 0.064 |
| 58.741 | 52.504 | 0.032 | 0.017 |
| 56.709 | 50.124 | 0.026 | 0.025 |
| 48.131 | 52.862 | 0.01  | 0.063 |
| 61.272 | 51.581 | 0.166 | 0     |
| 46.472 | 46.455 | 0.124 | 0.045 |
| 46.43  | 57.893 | 0.027 | 0.035 |
| 53.441 | 52.254 | 0.038 | 0.065 |
| 59.366 | 48.758 | 0.038 | 0.093 |
| 45.594 | 41.67  | 0.038 | 0.004 |
| 44.462 | 49.592 | 0.025 | 0.101 |
| 56.276 | 51.091 | 0.032 | 0.043 |
| 43.869 | 53.664 | 0.048 | 0.076 |
| 49     | 49.97  | 0.077 | 0.041 |
| 54.092 | 49.895 | 0.054 | 0.029 |
| 56.553 | 68.84  | 0.025 | 0.07  |
| 53.018 | 54.914 | 0.013 | 0.244 |
| 53.552 | 49.953 | 0     | 0.011 |
| 53.702 | 47.818 | 0.02  | 0.032 |
| 60.654 | 49.107 | 0.038 | 0.359 |
| 49.545 | 55.683 | 0.074 | 0.08  |

Protein concentration [mg/mL] before SEC isolation (PFP samples) and after SEC isolation (EVs fractions) in both IIM patients (n=65) and HDs (n=65).

**Table S2. Mean concentration of positive EVs to the surface markers detected by imaging flow cytometry**

|                       | <b>Total EVs samples</b>                | <b>Males vs. females</b>                                                                               | <b>IIM vs. HDs</b>                                                                                     |
|-----------------------|-----------------------------------------|--------------------------------------------------------------------------------------------------------|--------------------------------------------------------------------------------------------------------|
| <b>CD63+</b>          | $2.65 \times 10^8 \pm 1.97 \times 10^8$ | $3.02 \times 10^8 \pm 2.11 \times 10^8$ vs.<br>$2.47 \times 10^8 \pm 1.89 \times 10^8$<br>(p = 0.3193) | $2.91 \times 10^8 \pm 2.07 \times 10^8$ vs.<br>$2.40 \times 10^8 \pm 1.85 \times 10^8$<br>(p = 0.3272) |
| <b>CD81+</b>          | $1.53 \times 10^7 \pm 1.89 \times 10^7$ | $1.37 \times 10^7 \pm 1.68 \times 10^7$ vs.<br>$1.61 \times 10^7 \pm 2.00 \times 10^7$<br>(p = 0.6457) | $1.62 \times 10^7 \pm 2.06 \times 10^7$ vs.<br>$1.44 \times 10^7 \pm 1.73 \times 10^7$<br>(p = 0.7093) |
| <b>CD9+</b>           | $6.17 \times 10^7 \pm 4.77 \times 10^7$ | $5.25 \times 10^7 \pm 2.38 \times 10^7$ vs.<br>$6.64 \times 10^7 \pm 5.57 \times 10^7$<br>(p = 0.2910) | $5.89 \times 10^7 \pm 4.78 \times 10^7$ vs.<br>$6.46 \times 10^7 \pm 4.83 \times 10^7$<br>(p = 0.6472) |
| <b>CD11c+</b>         | $6.43 \times 10^6 \pm 7.21 \times 10^6$ | $6.08 \times 10^6 \pm 6.95 \times 10^6$ vs.<br>$6.60 \times 10^6 \pm 7.42 \times 10^6$<br>(p = 0.7952) | $7 \times 10^6 \pm 7.78 \times 10^6$ vs.<br>$5.85 \times 10^6 \pm 6.68 \times 10^6$<br>(p = 0.5413)    |
| <b>CD63/CD81+</b>     | $1.89 \times 10^6 \pm 2.70 \times 10^6$ | $1.94 \times 10^6 \pm 2.57 \times 10^6$ vs.<br>$1.86 \times 10^6 \pm 2.80 \times 10^6$<br>(p = 0.9204) | $2.14 \times 10^6 \pm 3.06 \times 10^6$ vs.<br>$1.63 \times 10^6 \pm 2.32 \times 10^6$<br>(p = 0.4675) |
| <b>CD63/CD9+</b>      | $2.38 \times 10^6 \pm 1.74 \times 10^6$ | $2.28 \times 10^6 \pm 1.59 \times 10^6$ vs.<br>$2.43 \times 10^6 \pm 1.82 \times 10^6$<br>(p = 0.7459) | $2.53 \times 10^6 \pm 1.75 \times 10^6$ vs.<br>$2.23 \times 10^6 \pm 1.74 \times 10^6$<br>(p = 0.5071) |
| <b>CD81/CD9+</b>      | $4.13 \times 10^5 \pm 6.24 \times 10^5$ | $4.98 \times 10^5 \pm 7.71 \times 10^5$ vs.<br>$3.70 \times 10^5 \pm 5.42 \times 10^5$<br>(p = 0.4569) | $4.71 \times 10^5 \pm 6.06 \times 10^5$ vs.<br>$3.54 \times 10^5 \pm 6.47 \times 10^5$<br>(p = 0.4711) |
| <b>CD63/CD11c+</b>    | $3.76 \times 10^6 \pm 7.30 \times 10^6$ | $4.75 \times 10^6 \pm 9.68 \times 10^6$ vs.<br>$3.27 \times 10^6 \pm 5.85 \times 10^6$<br>(p = 0.4632) | $4.40 \times 10^6 \pm 7.62 \times 10^6$ vs.<br>$3.12 \times 10^6 \pm 7.04 \times 10^6$<br>(p = 0.5032) |
| <b>CD81/CD11c+</b>    | $3.28 \times 10^5 \pm 6.22 \times 10^5$ | $4.40 \times 10^5 \pm 8.21 \times 10^5$ vs.<br>$2.73 \times 10^5 \pm 4.97 \times 10^5$<br>(p = 0.3302) | $3.33 \times 10^5 \pm 5.50 \times 10^5$ vs.<br>$3.24 \times 10^5 \pm 6.96 \times 10^5$<br>(p = 0.9555) |
| <b>CD9/CD11c+</b>     | $2.34 \times 10^6 \pm 4.17 \times 10^6$ | $2.85 \times 10^6 \pm 5.30 \times 10^6$ vs.<br>$2.08 \times 10^6 \pm 3.52 \times 10^6$<br>(p = 0.5028) | $2.71 \times 10^6 \pm 4.16 \times 10^6$ vs.<br>$1.96 \times 10^6 \pm 4.21 \times 10^6$<br>(p = 0.4934) |
| <b>CD63/CD81/CD9+</b> | $2.77 \times 10^5 \pm 5.53 \times 10^5$ | $3.95 \times 10^5 \pm 7.81 \times 10^5$ vs.<br>$2.21 \times 10^5 \pm 4.05 \times 10^5$<br>(p = 0.2630) | $2.77 \times 10^5 \pm 4.83 \times 10^5$ vs.<br>$2.76 \times 10^5 \pm 6.22 \times 10^5$<br>(p = 0.9940) |

Mean concentration [EVs/mL]  $\pm$  SD of single, double and triple positive EVs to the surface markers in EVs samples (n=60), males (n=20) vs. females (n=40), and IIM patients (n=30) vs. HDs (n=30).

**Table S3. EVs concentration and size by nanoparticles tracking analysis measurements**

|                                   | Total EVs samples                             | Males vs. females                                                                                               | IIM vs. HDs                                                                                                       |
|-----------------------------------|-----------------------------------------------|-----------------------------------------------------------------------------------------------------------------|-------------------------------------------------------------------------------------------------------------------|
| <b>EVs concentration [EVs/mL]</b> | $1.51 \times 10^{10} \pm 1.06 \times 10^{10}$ | $1.46 \times 10^{10} \pm 9.28 \times 10^9$ vs.<br>$1.54 \times 10^{10} \pm 1.12 \times 10^{10}$<br>(p = 0.6737) | $1.71 \times 10^{10} \pm 1.29 \times 10^{10}$ vs.<br>$1.31 \times 10^{10} \pm 7.17 \times 10^9$<br>(p = 0.0306 *) |
| <b>EVs mean size (nm)</b>         | $201.6 \pm 19.04$                             | $198.6 \pm 19.20$ vs.<br>$203.1 \pm 18.88$<br>(p = 0.1989)                                                      | $199 \pm 20.02$ vs.<br>$204.1 \pm 17.78$<br>(p = 0.1227)                                                          |
| <b>EVs mode size (nm)</b>         | $153.4 \pm 18.40$                             | $151.8 \pm 19.04$ vs.<br>$154.2 \pm 18.11$<br>(p = 0.4718)                                                      | $151.9 \pm 19.81$ vs.<br>$154.8 \pm 16.89$<br>(p = 0.3706)                                                        |

Mean EVs concentration [EVs/mL]  $\pm$  SD, mean size (nm  $\pm$  SD), and mode size (nm  $\pm$  SD) measured by NTA in total EVs samples analysed (n=130), males (n=44) vs. females (n=86), and IIM patients (n=65) vs. HDs (n=65).

**Table S4. EVs concentrations measured by nanoparticles tracking analysis.**

| EVs concentration [EVs/mL] |                       |
|----------------------------|-----------------------|
| IIM                        | HDs                   |
| $1.76 \times 10^{10}$      | $1.43 \times 10^{10}$ |
| $1.56 \times 10^{10}$      | $1.96 \times 10^{10}$ |
| $2.47 \times 10^{10}$      | $1.19 \times 10^{10}$ |
| $1.76 \times 10^{10}$      | $1.6 \times 10^{10}$  |
| $1.98 \times 10^{10}$      | $1.57 \times 10^{10}$ |
| $1.08 \times 10^{10}$      | $1.36 \times 10^{10}$ |
| $1.57 \times 10^{10}$      | $1.71 \times 10^{10}$ |
| $1.02 \times 10^{10}$      | $1.51 \times 10^{10}$ |
| $8.5 \times 10^9$          | $6.35 \times 10^9$    |
| $1.09 \times 10^{10}$      | $9.46 \times 10^9$    |
| $2.09 \times 10^{10}$      | $1.46 \times 10^{10}$ |
| $3.45 \times 10^{10}$      | $3.45 \times 10^{10}$ |
| $1.9 \times 10^{10}$       | $1.99 \times 10^{10}$ |
| $1.81 \times 10^{10}$      | $1.15 \times 10^{10}$ |
| $1.26 \times 10^{10}$      | $8.62 \times 10^9$    |
| $2.36 \times 10^{10}$      | $6.95 \times 10^9$    |
| $4.54 \times 10^{10}$      | $3.23 \times 10^{10}$ |
| $1.88 \times 10^{10}$      | $1.79 \times 10^{10}$ |
| $3.97 \times 10^{10}$      | $2.17 \times 10^{10}$ |
| $1.29 \times 10^{10}$      | $2.66 \times 10^{10}$ |
| $2.08 \times 10^{10}$      | $6.94 \times 10^9$    |
| $6.52 \times 10^{10}$      | $9.99 \times 10^9$    |
| $8.56 \times 10^{10}$      | $3.03 \times 10^{10}$ |
| $7.59 \times 10^9$         | $9.14 \times 10^9$    |
| $1.16 \times 10^{10}$      | $1.13 \times 10^{10}$ |

|                         |                         |
|-------------------------|-------------------------|
| 1.68 x 10 <sup>10</sup> | 8.68 x 10 <sup>9</sup>  |
| 1.3 x 10 <sup>10</sup>  | 3.8 x 10 <sup>10</sup>  |
| 1.16 x 10 <sup>10</sup> | 1.34 x 10 <sup>10</sup> |
| 7.25 x 10 <sup>9</sup>  | 1.09 x 10 <sup>10</sup> |
| 2.03 x 10 <sup>10</sup> | 1.28 x 10 <sup>10</sup> |
| 1.27 x 10 <sup>10</sup> | 8.9 x 10 <sup>9</sup>   |
| 7.75 x 10 <sup>9</sup>  | 6.6 x 10 <sup>9</sup>   |
| 8.31 x 10 <sup>9</sup>  | 9.57 x 10 <sup>9</sup>  |
| 1.65 x 10 <sup>10</sup> | 1.1 x 10 <sup>10</sup>  |
| 9.7 x 10 <sup>9</sup>   | 1.48 x 10 <sup>10</sup> |
| 1.95 x 10 <sup>10</sup> | 7.84 x 10 <sup>9</sup>  |
| 2.74 x 10 <sup>10</sup> | 2.61 x 10 <sup>10</sup> |
| 2.16 x 10 <sup>10</sup> | 1.26 x 10 <sup>10</sup> |
| 1.39 x 10 <sup>10</sup> | 1.33 x 10 <sup>10</sup> |
| 1.41 x 10 <sup>10</sup> | 7.15 x 10 <sup>9</sup>  |
| 1.5 x 10 <sup>10</sup>  | 5.24 x 10 <sup>9</sup>  |
| 2.03 x 10 <sup>10</sup> | 1.47 x 10 <sup>10</sup> |
| 1.49 x 10 <sup>10</sup> | 1.34 x 10 <sup>10</sup> |
| 1.04 x 10 <sup>10</sup> | 6.47 x 10 <sup>9</sup>  |
| 1.06 x 10 <sup>10</sup> | 1.13 x 10 <sup>10</sup> |
| 1.25 x 10 <sup>10</sup> | 9.04 x 10 <sup>9</sup>  |
| 1.35 x 10 <sup>10</sup> | 1.79 x 10 <sup>10</sup> |
| 1.08 x 10 <sup>10</sup> | 6 x 10 <sup>9</sup>     |
| 7.6 x 10 <sup>9</sup>   | 8.38 x 10 <sup>9</sup>  |
| 4.72 x 10 <sup>9</sup>  | 1.4 x 10 <sup>10</sup>  |
| 7.65 x 10 <sup>9</sup>  | 9.79 x 10 <sup>9</sup>  |
| 7.09 x 10 <sup>9</sup>  | 8.26 x 10 <sup>9</sup>  |
| 1.2 x 10 <sup>10</sup>  | 2.2 x 10 <sup>10</sup>  |
| 1.48 x 10 <sup>10</sup> | 4.28 x 10 <sup>9</sup>  |
| 1.13 x 10 <sup>10</sup> | 6.83 x 10 <sup>9</sup>  |
| 7.22 x 10 <sup>9</sup>  | 1.2 x 10 <sup>10</sup>  |
| 1.72 x 10 <sup>10</sup> | 6.57 x 10 <sup>9</sup>  |
| 9.99 x 10 <sup>9</sup>  | 1.05 x 10 <sup>10</sup> |
| 1.18 x 10 <sup>10</sup> | 9.82 x 10 <sup>9</sup>  |
| 1.37 x 10 <sup>10</sup> | 9.3 x 10 <sup>9</sup>   |
| 2.5 x 10 <sup>10</sup>  | 1.07 x 10 <sup>10</sup> |
| 8.96 x 10 <sup>9</sup>  | 8.63 x 10 <sup>9</sup>  |
| 1.52 x 10 <sup>10</sup> | 5.95 x 10 <sup>9</sup>  |
| 1.83 x 10 <sup>10</sup> | 1.01 x 10 <sup>10</sup> |
| 7.86 x 10 <sup>9</sup>  | 1.11 x 10 <sup>10</sup> |

EVs concentration [EVs/mL] measured by NTA in IIM patients (n=65) and HDs (n=65).
